# Supplementary material
Source: MDPI journal article supplement (https://www.mdpi.com/2227-7102/13/7/759)
Supplement: s1 [file s1]

Supporting Material for:

# Using Stop Motion Animations to Activate and Analyze High School Students' Naïve Ideas on Reaction Mechanisms

Benjamin Pölloth <sup>1,\*</sup>, Dominik Schäffer <sup>1</sup>, and Stefan Schwarzer <sup>1</sup>

## 1. Original German wording of work assignment

The wording in German of the work assignments were (English translation in the main text):

Data Collection B:

*„Erstellen Sie in Ihrer Gruppe Stop Motion Videos, in denen Sie Schritt für Schritt darstellen, wie die Edukte zu den Produkten reagieren. Sie können gerne mehrere Videos erstellen, wenn Sie mehrere Ideen haben.“*

Data Collection C:

*“Auf den iPads finden Sie zwei Beispielvideos zum Verlauf einer Reaktion, wie Sie sie zu Beginn selbst erstellt haben. Schauen Sie die Videos an und nennen Sie den zentralen Unterschied zwischen den beiden Reaktionsabläufen. Diskutieren Sie, wie die Reaktion Ihrer Einschätzung nach am wahrscheinlichsten abläuft. Bitte antworten Sie möglichst ausführlich (mind. 5 Sätze).“*

## 2. Textbook style SMAs for S<sub>N</sub>1 and S<sub>N</sub>2 reactions

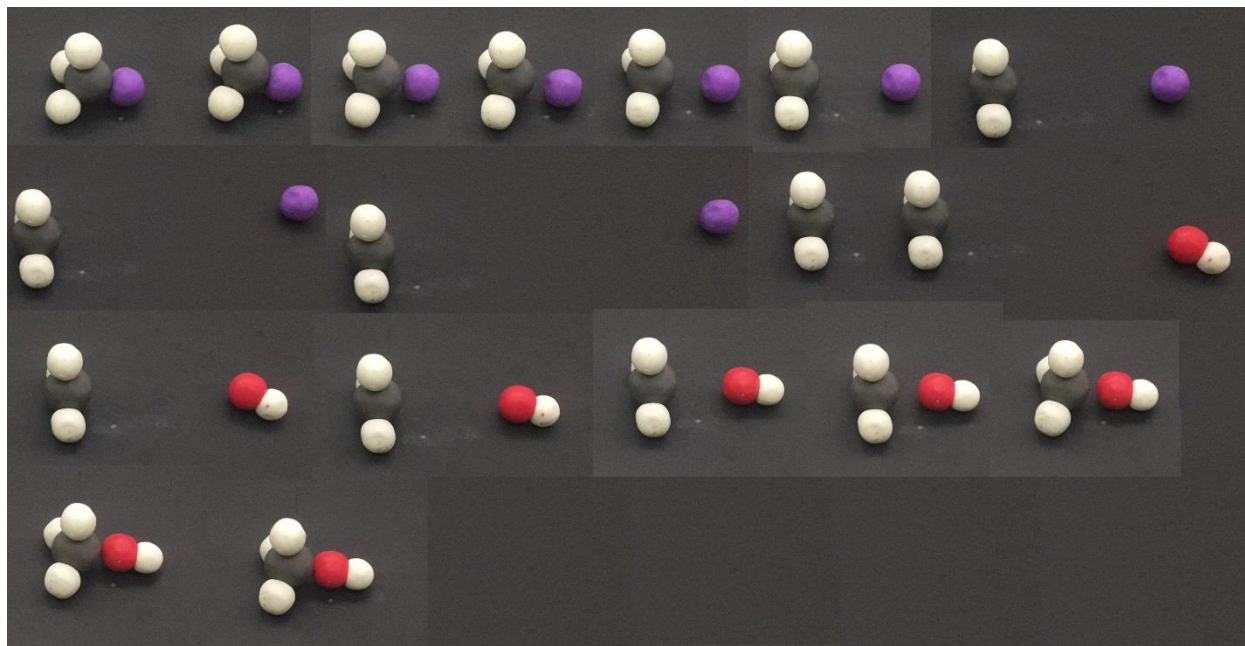

Figure S1: Frames of the pre-made SMA for textbook style S<sub>N</sub>1 reactions. This SMA was used for students' evaluation. The frames above are cropped.

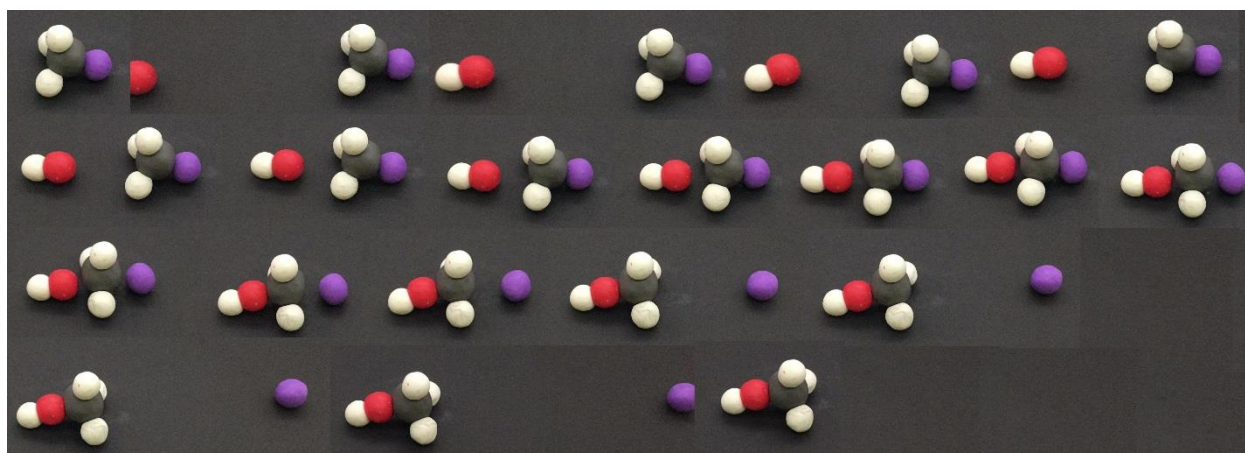

Figure S2: Frames of the pre-made SMA for textbook style  $S_N2$  reactions. This SMA was used for students' evaluation. The frames above are cropped.

### 3. Anchoring examples for student-generated SMAs

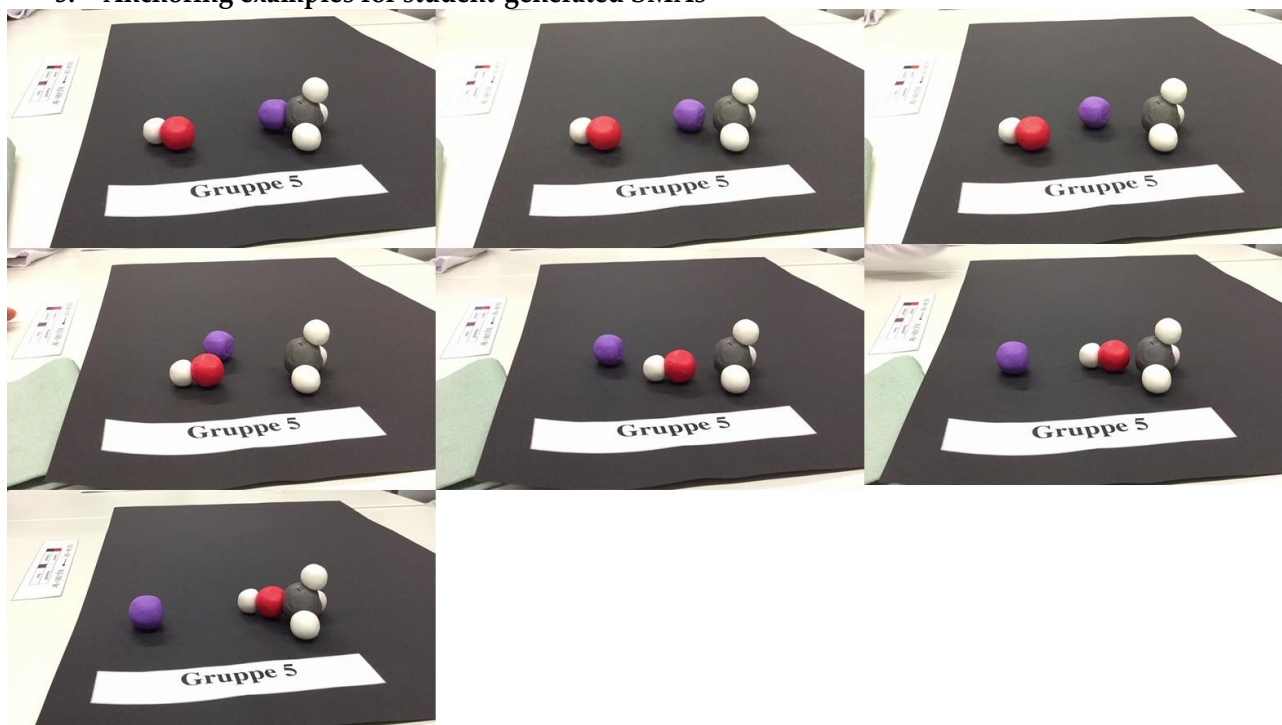

Figure S3: Frames of a typical example of a student-generated SMA of type AX.

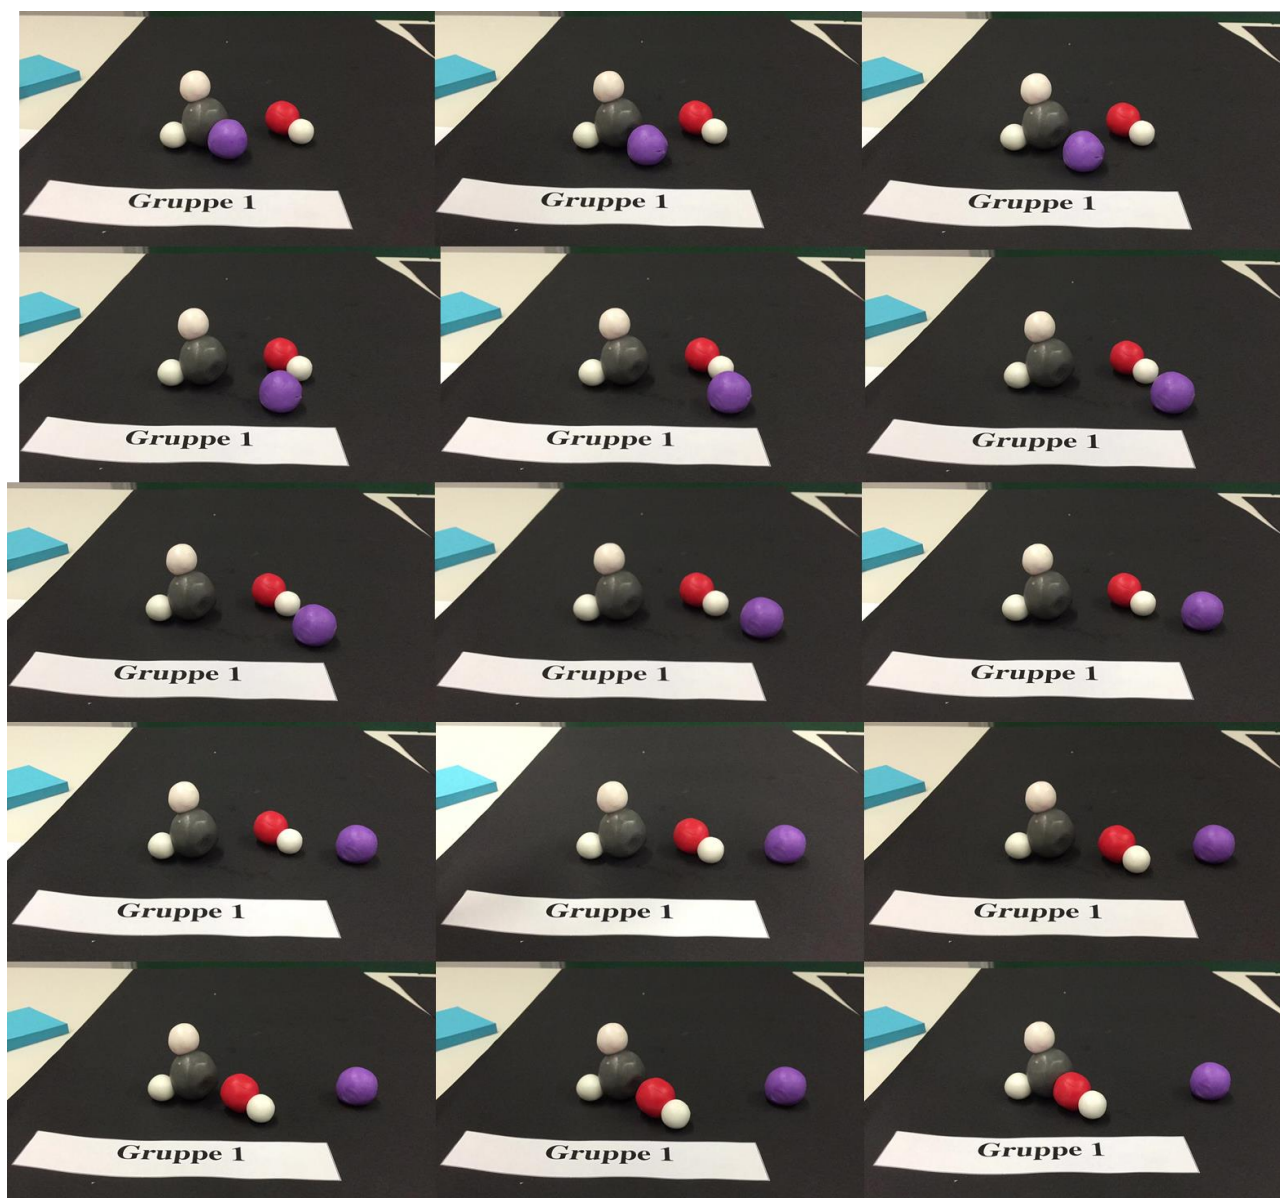

Figure S4: Frames of a typical example of a student-generated SMA of type AB.

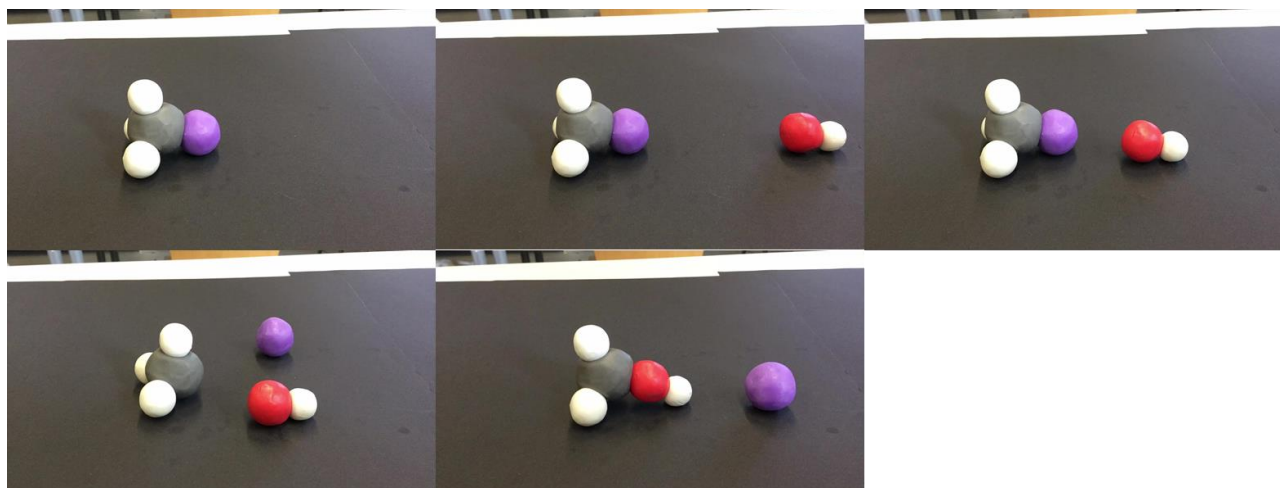

Figure S5: Frames of a typical example of a student-generated SMA of type BX.



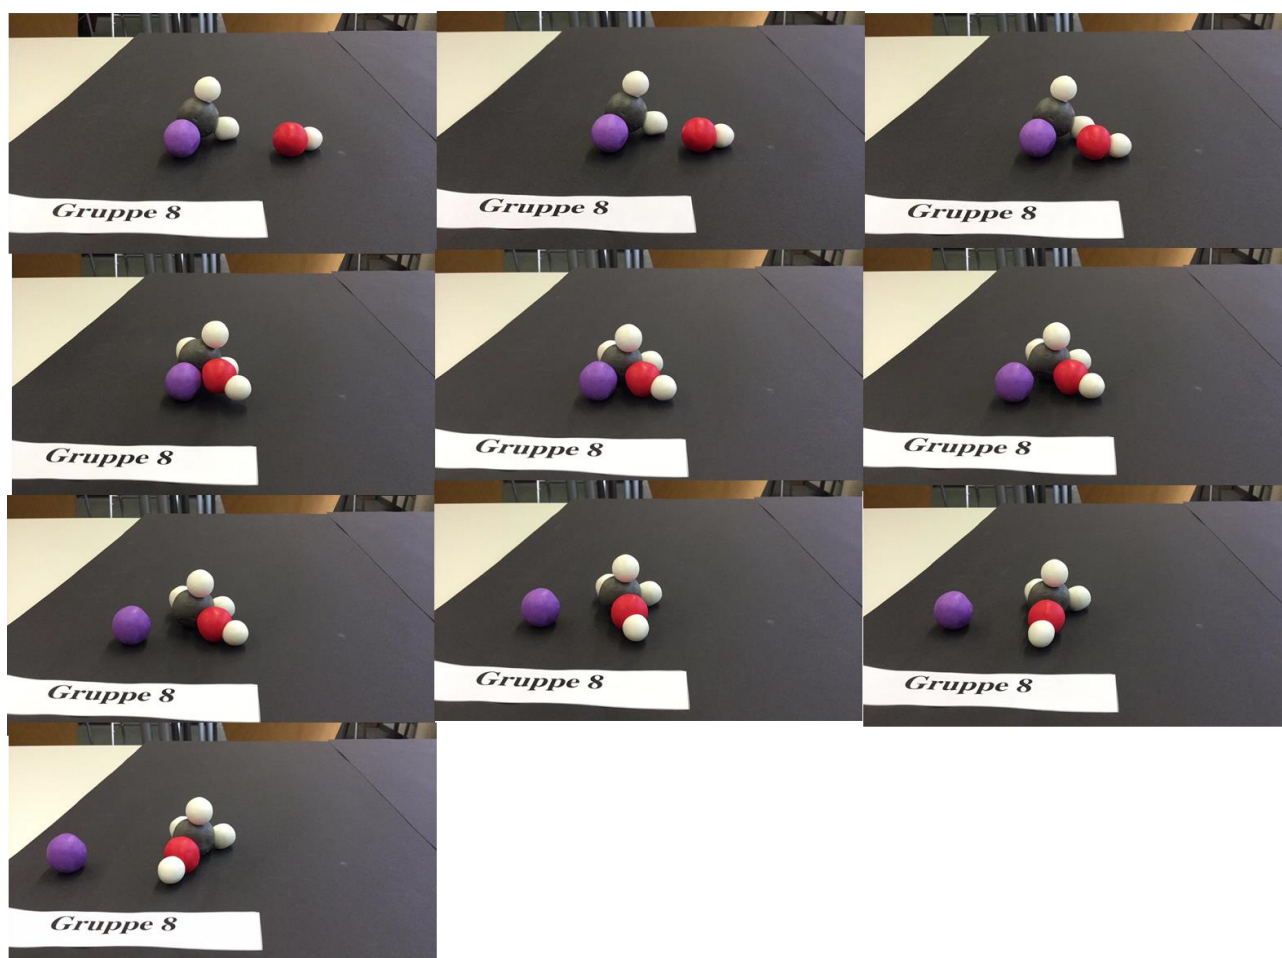

Figure S6: Frames of a typical example of a student-generated SMA of type BA.

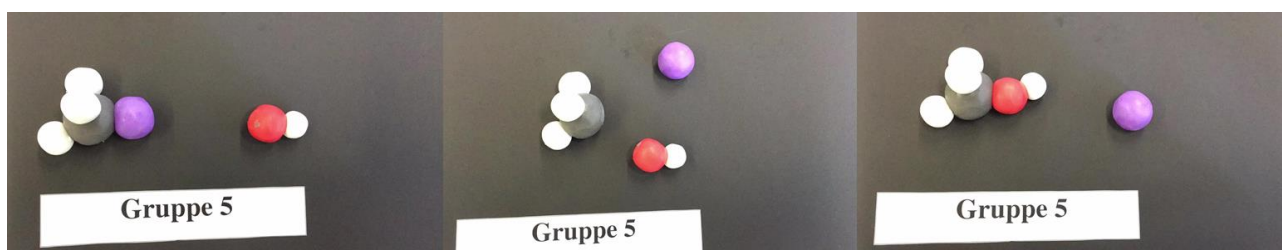

Figure S7: Frames of a typical example of a student-generated SMA of type X.

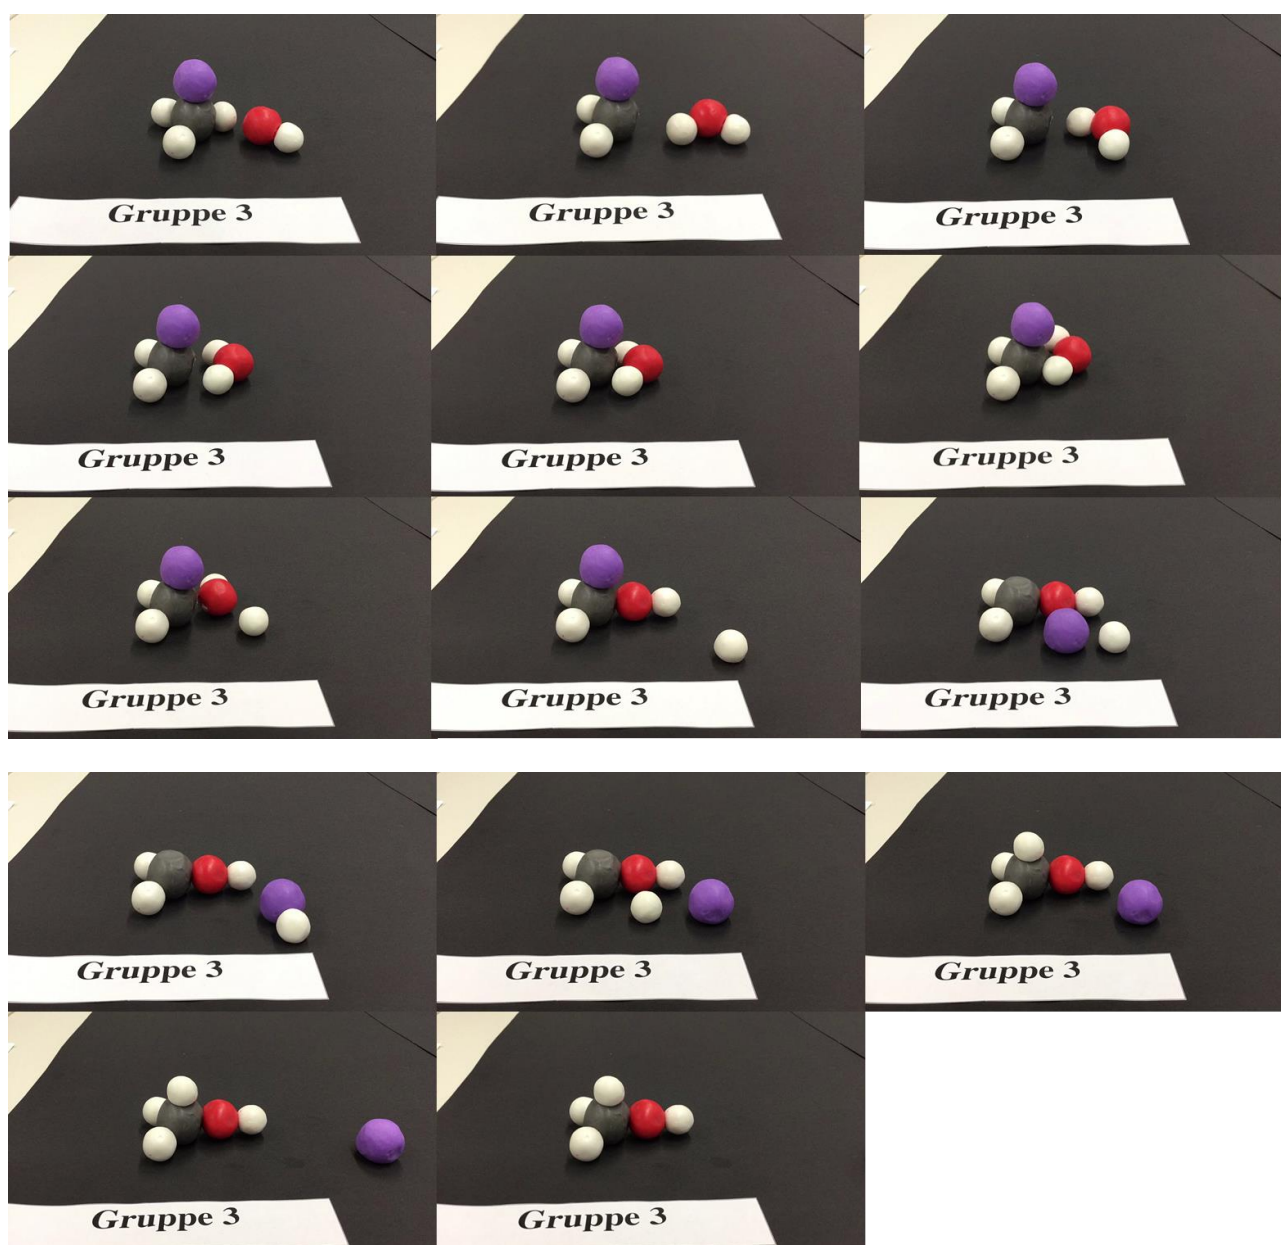

Figure S8: Frames of a typical example of a student-generated SMA of type OTHER.

#### 4. Student's wording on bond-breaking and bond-making

Table S1: Wording of students used to describe bond-breaking and bond-making as depicted in the word cloud in the main text.

|               | German original                           | English translation         | Times used |
|---------------|-------------------------------------------|-----------------------------|------------|
| bond-making   | rangehen                                  | approaches                  | 1          |
|               | sich (an-) fügen                          | fits in                     | 1          |
|               | verknüpfen                                | links                       | 1          |
|               | Lücke schließen/auffüllen                 | closes/fills gap            | 2          |
|               | treten/schreiten                          | steps                       | 2          |
|               | (die Bindung) eingehen                    | make the connection         | 3          |
|               | sich anhängen/sich anheften/sich anlagern | attaches                    | 14         |
|               | ersetzen                                  | replaces                    | 2          |
|               | andocken                                  | docks                       | 7          |
|               | (den Bindungspartner) finden              | finds (the binding partner) | 1          |
|               | auftreffen                                | encounters                  | 1          |
|               | reagieren                                 | reacts                      | 4          |
|               | kommen                                    | comes                       | 17         |
|               | sich (ver-) binden                        | binds                       | 33         |
|               | aufnehmen                                 | takes up                    | 1          |
|               |                                           |                             |            |
| bond-breaking | Bindung frei werden                       | bond becomes free           | 1          |
|               | verlassen                                 | leaves                      | 2          |
|               | wird abgegeben                            | is released                 | 3          |
|               | wird entfernt                             | is removed                  | 1          |
|               | wird verdrängt                            | is displaced                | 2          |
|               | aufbrechen                                | breaks open                 | 1          |
|               | wird (ab-) getrennt                       | is separated                | 6          |
|               | sich trennen                              | separates                   | 12         |
|               | wird abgestoßen                           | is repelled                 | 7          |
|               | sich abkapseln                            | encapsulates                | 1          |
|               | verschwinden/sich entfernen               | disappears                  | 2          |
|               | weggehen                                  | goes away                   | 6          |
|               | wird (ab-) gespalten                      | is split (off)              | 26         |
|               | sich abspalten                            | splits off                  | 22         |
|               | sich verabschieden                        | says goodbye                | 1          |
|               | wird (ab-) gelöst                         | comes off                   | 3          |
|               | sich (ab-) lösen                          | detaches                    | 21         |

## 5. Category system of students' argumentation

Table S2: Category system of students' argumentation in Data Collection C. An anchoring example is given. Student statements were translated with the help of DeepL.

| Category<br>(German Original/English Translation)                                                                    | Anchoring Example<br>(German Original/English Translation)                                                                                                                                                                                                                                                                                                                                                                                                                                               | Number<br>of coded<br>items | Number of groups<br>with codes in cate-<br>gory |
|----------------------------------------------------------------------------------------------------------------------|----------------------------------------------------------------------------------------------------------------------------------------------------------------------------------------------------------------------------------------------------------------------------------------------------------------------------------------------------------------------------------------------------------------------------------------------------------------------------------------------------------|-----------------------------|-------------------------------------------------|
| Bindungen > freie oder besetzte Bindungsplätze<br><i>Chemical bonds &gt; bonding sites</i>                           | Video 1 stellt die Reaktion wahrscheinlicher dar, da bei Video 2 keine Bindung frei war, bis das Brom weg war, die Gruppe jedoch schon sich an das Molekül bindet. Bei Video 1 wird als erstes eine Bindung frei, die dann mit der Gruppe aufgefüllt wird.<br><br><i>Video 1 shows the reaction more likely, because in video 2 no bond was free until the bromine was gone, but the group already binds to the molecule. In video 1, a bond is released first, which is then filled with the group.</i> | 9                           | 6                                               |
| Bindungen > Bindungsanzahl<br><i>Chemical bonds &gt; number of bonds</i>                                             | Meines erachtens [sic!] nach, ist Video II am wahrscheinlichsten, da durch das Hinzufügen der Hydroxy-Gruppe das C-Atom zu viele Bindungen eingeht und deshalb das Br abgespalten muss (→ Oktettregel).<br><br><i>In my opinion, Video II is the most probable, since the addition of the hydroxyl group causes the C atom to form too many bonds and must therefore split off the Br (→ octet rule).</i>                                                                                                | 5                           | 4                                               |
| Bindungsverhältnisse > Konkurrenz von Bindungspartnern<br><i>Chemical bonds &gt; competition of bonding partners</i> | In Video 2 konkurrieren das OH <sup>-</sup> -Ion und das Brom um die Bindung mit dem C-Atom. Dabei wird Br <sup>-</sup> abgespalten und OH <sup>-</sup> geht die Bindung ein.<br><br><i>In Video 2, the OH<sup>-</sup> ion and the bromine compete for the bond with the C atom. In the process, Br<sup>-</sup> is split off and OH<sup>-</sup> forms the bond</i>                                                                                                                                       | 7                           | 3                                               |
| Bindungsverhältnisse > relative Anordnung von H-Atomen<br><i>Chemical bonds &gt; position of the H-atoms</i>         | Brom wird abgespalten & Anordnung der H-Atome ändert sich (rücken nach „vorne“). OH <sup>-</sup> heftet sich „hinten“ an.                                                                                                                                                                                                                                                                                                                                                                                | 2                           | 2                                               |

|                                                          |                                                                                                                                                                                                                                                                                                                                                                                                                                                                                                                                                          |    |    |
|----------------------------------------------------------|----------------------------------------------------------------------------------------------------------------------------------------------------------------------------------------------------------------------------------------------------------------------------------------------------------------------------------------------------------------------------------------------------------------------------------------------------------------------------------------------------------------------------------------------------------|----|----|
|                                                          | <i>Bromine is split off &amp; arrangement of H atoms changes (back to "front"). OH- attaches to the "back".</i>                                                                                                                                                                                                                                                                                                                                                                                                                                          |    |    |
| Plausibilität<br><i>plausibility</i>                     | <p>Video 2 ist wahrscheinlicher, da in Video 1 sich das Bromid ohne Grund abspaltet und erst anschließend, <del>sich die</del> das Hydroxid bindet. Im Gegensatz dazu verursacht in Video 2 das Hydroxid die Spaltung des Bromid durch Bindung an das C-Atom.</p> <p><i>Video 2 is more likely, because in video 1 the bromide splits off for no reason and only afterwards, the hydroxide binds. In contrast, in video 2 the hydroxide causes the cleavage of the bromide by bonding to the C atom.</i></p>                                             | 25 | 12 |
| Wechselwirkungen<br><i>interactions</i>                  | <p>Durch das Abspalten des Brom-Atoms wird das C-Atom positiver, weswegen das Hydroxid-Ion angezogen wird. Somit kann dieses an das C-Atom binden.</p> <p><i>By splitting off the bromine atom, the C atom becomes more positive, which is why the hydroxide ion is attracted. This allows the hydroxide ion to bind to the C atom.</i></p>                                                                                                                                                                                                              | 21 | 11 |
| Elektronenkonfiguration<br><i>electron configuration</i> | <p>Vorgang wie in Video 1 ist wahrscheinlicher, da freies Elektronen-paar, woran OH<sup>-</sup> binden kann, erst vorhanden ist, wenn Brom sich löst.</p> <p><i>Process as in video 1 is more likely, since free electron pair to which OH- can bind is present only when bromine dissolves.</i></p>                                                                                                                                                                                                                                                     | 6  | 4  |
| Nähe oder Abstand<br><i>proximity or distance</i>        | <p>Video 2 scheint wahrscheinlicher, da das Brom- in Anwesenheit von OH<sup>-</sup> verdrängt/abgespalten wird, OH<sup>-</sup> bindet sich an CH<sub>3</sub> und Br<sup>-</sup> wird abgetrennt. Video 1 ergibt keinen Sinn, da das Brom ohne Änderung der räumlichen Gegebenheiten sich trennt.</p> <p><i>Video 2 seems more likely since the bromine- is displaced/separated in the presence of OH-, OH- binds to CH3 and Br- is separated. Video 1 does not make sense because the bromine separates without changing the spatial conditions.</i></p> | 8  | 4  |



|                                                        |                                                                                                                                                                                                                                                                                                                                                                                                                                                                                                                                                               |   |   |
|--------------------------------------------------------|---------------------------------------------------------------------------------------------------------------------------------------------------------------------------------------------------------------------------------------------------------------------------------------------------------------------------------------------------------------------------------------------------------------------------------------------------------------------------------------------------------------------------------------------------------------|---|---|
| <p>Zwischenzustände<br/><i>intermediate states</i></p> | <p>Meiner Einschätzung nach läuft die Reaktion eher wie in Video 1 ab, da durch das Lösen des Broms vom restlichen Molekül ein Zwischenzustand entsteht, bei dem ein freies Elektronenpaar am Molekül die Möglichkeit bietet, eine OH<sup>-</sup>-Gruppe zu binden.</p> <p><i>My guess is that the reaction proceeds more like Video 1, in that the detachment of the bromine from the rest of the molecule creates an intermediate state in which a free pair of electrons on the molecule provides the opportunity to bond an OH<sup>-</sup> group.</i></p> | 2 | 2 |
| <p>Energetik<br/><i>energetics</i></p>                 | <p>Im Bezug auf die Stoßtheorie halte ich Vid 2 für plausibler, da die Abspaltung von Br ohne ersichtlichen Grund nicht gerade wahrscheinlich/energetisch sinnvoll ist.</p> <p><i>In terms of collision theory, I think Vid 2 is more plausible, since splitting off Br for no apparent reason is not exactly likely/energy wise.</i></p>                                                                                                                                                                                                                     | 1 | 1 |
